# Supplementary material
Source: publisher figshare collection journal article supplement (https://acs.figshare.com/ndownloader/files/4403887)
Supplement: Supplementary file 1 [file 4403887]

# 1. SUBMISSION DETAILS

_publ_contact_autor
;
        Martin Nieger
        Laboratory of Inorganic Chemistry
        Department of Chemistry
        Universitity of Helsinki
        P.O. Box 55
        FIN-00014 University of Helsinki
        Finland
;
_publ_contact_author_phone        '++358 9 191 50223'
_publ_contact_author_fax          '++358 9 191 50198'
_publ_contact_author_email        'martin.nieger@helsinki.fi'
_publ_requested_journal           'J. Am. Chem. Soc.'
_publ_requested_coeditor_name     ?

_publ_contact_letter
;
 enclosed you will find the necessary data 
 for our publication in J. Am. Chem. Soc.
;

#==============================================================================

# 3. TITLE AND AUTHOR LIST

_publ_section_title
;
 NMR-Spectroscopic and Solid-State Investigations of the Co-Metal Free 
 Asymmetric Conjugate Addition: The First Paracyclophanimine-Zinc-Methyl 
 Complex
;

loop_
 _publ_author_name
 _publ_author_address
     'Ay, Sefer'
;    Institut f\"ur Organische Chemie
      Universit\"at Karlsruhe (TH)
      Fritz-Haber-Weg 6
      D-76131 Karlsruhe
      Germany
;
     'Ziegert, R. E.'
;    Institut f\"ur Organische Chemie
      Universit\"at Karlsruhe (TH)
      Fritz-Haber-Weg 6
      D-76131 Karlsruhe
      Germany
;
     'Zhang, H.'
;    Institute of Organic Chemistry
      Universitity of Regensburg
      Un iversit\"atsstr. 31
      D-93040 regensburg
      Germany
;
     'Nieger, Martin'
;    Laboratory of Inorganic Chemistry
      Department of Chemistry
      Universitity of Helsinki
      P.O. Box 55
      FIN-00014 University of Helsinki
      Finland
;
     'Rissanen, Kari'
;    Laboratory of Organic Chemistry
      Universitity of Jyv\"askyl\"a
      P.O. Box 35
      FIN-40014 University of Jyv\"askyl\"a
      Finland
;
     'Gschwing, Ruth M.'
;    Institute of Organic Chemistry
      Universitity of Regensburg
      Un iversit\"atsstr. 31
      D-93040 regensburg
      Germany
;
     'Br\"ase, Stefan'
;    Institut f\"ur Organische Chemie
      Universit\"at Karlsruhe (TH)
      Fritz-Haber-Weg 6
      D-76131 Karlsruhe
      Germany
;
#==============================================================================
 
data_sb061_m 
 
_audit_creation_method            SHELXL-97 
_chemical_name_systematic 
; 
 ? 
; 
_chemical_name_common             ? 
_chemical_melting_point           ? 
_chemical_formula_moiety          'C54 H58 N2 O2 Zn2, (C7 H8)0.5'  
_chemical_formula_sum 
 'C57.50 H62 N2 O2 Zn2' 
_chemical_formula_weight          943.83 
_chemical_absolute_configuration  ad

loop_ 
 _atom_type_symbol 
 _atom_type_description 
 _atom_type_scat_dispersion_real 
 _atom_type_scat_dispersion_imag 
 _atom_type_scat_source 
 'C'  'C'   0.0033   0.0016 
 'International Tables Vol C Tables 4.2.6.8 and 6.1.1.4' 
 'H'  'H'   0.0000   0.0000 
 'International Tables Vol C Tables 4.2.6.8 and 6.1.1.4' 
 'N'  'N'   0.0061   0.0033 
 'International Tables Vol C Tables 4.2.6.8 and 6.1.1.4' 
 'O'  'O'   0.0106   0.0060 
 'International Tables Vol C Tables 4.2.6.8 and 6.1.1.4' 
 'Zn'  'Zn'   0.2839   1.4301 
 'International Tables Vol C Tables 4.2.6.8 and 6.1.1.4' 
 
_symmetry_cell_setting            trigonal 
_symmetry_space_group_name_H-M    'P 31 2 1'
 
loop_ 
 _symmetry_equiv_pos_as_xyz 
 'x, y, z' 
 '-y, x-y, z+1/3' 
 '-x+y, -x, z+2/3' 
 'y, x, -z' 
 'x-y, -y, -z+2/3' 
 '-x, -x+y, -z+1/3' 
 
_cell_length_a                    13.2807(4) 
_cell_length_b                    13.2807(4) 
_cell_length_c                    52.5695(17) 
_cell_angle_alpha                 90.00 
_cell_angle_beta                  90.00 
_cell_angle_gamma                 120.00 
_cell_volume                      8029.8(4) 
_cell_formula_units_Z             6 
_cell_measurement_temperature     123(2) 
_cell_measurement_reflns_used     221797 
_cell_measurement_theta_min       1 
_cell_measurement_theta_max       27.5 
 
_exptl_crystal_description        blocks 
_exptl_crystal_colour             yellow 
_exptl_crystal_size_max           0.35 
_exptl_crystal_size_mid           0.20 
_exptl_crystal_size_min           0.15 
_exptl_crystal_density_meas       none 
_exptl_crystal_density_diffrn     1.171 
_exptl_crystal_density_method     'not measured' 
_exptl_crystal_F_000              2982 
_exptl_absorpt_coefficient_mu     0.936 
_exptl_absorpt_correction_type    multi-scan 
_exptl_absorpt_correction_T_min   0.75154
_exptl_absorpt_correction_T_max   0.87994
_exptl_absorpt_process_details    'MULABS (PLaton, cf. Blessing, 1995)' 
 
_exptl_special_details 
; 
 dx = 100 mm, 140 sec./deg., 0.5 deg., 10 sets, 3157 frames,
 mos.= 0.639(7) deg
; 
 
_diffrn_ambient_temperature       123(2) 
_diffrn_radiation_wavelength      0.71073 
_diffrn_radiation_type            MoK\a 
_diffrn_radiation_source          'fine-focus sealed tube' 
_diffrn_radiation_monochromator   graphite 
_diffrn_measurement_device_type   'Bruker APEXII' 
_diffrn_measurement_method        'rotation in phi and omega, 0.5 deg.' 
_diffrn_detector_area_resol_mean  ? 
_diffrn_standards_number          ? 
_diffrn_standards_interval_count  ? 
_diffrn_standards_interval_time   ? 
_diffrn_standards_decay_%         ? 
_diffrn_reflns_number             88125 
_diffrn_reflns_av_R_equivalents   0.0694 
_diffrn_reflns_av_sigmaI/netI     0.0334 
_diffrn_reflns_limit_h_min        -17 
_diffrn_reflns_limit_h_max        17 
_diffrn_reflns_limit_k_min        -17 
_diffrn_reflns_limit_k_max        16 
_diffrn_reflns_limit_l_min        -68 
_diffrn_reflns_limit_l_max        68 
_diffrn_reflns_theta_min          3.10 
_diffrn_reflns_theta_max          27.48 
_reflns_number_total              12234 
_reflns_number_gt                 11103 
_reflns_threshold_expression      >2sigma(I) 
 
_computing_data_collection        'Collect (Nonius, 1998)' 
_computing_cell_refinement        DENZO-SMN  
_computing_data_reduction         DENZO-SMN  
_computing_structure_solution     'SHELXS-97 (Sheldrick, 1990)' 
_computing_structure_refinement   'SHELXL-97 (Sheldrick, 1997)' 
_computing_molecular_graphics     XP 
_computing_publication_material   'SHELXL-97 (Sheldrick, 1997)'  
 
_refine_special_details 
; 
 Refinement of F^2^ against ALL reflections.  The weighted R-factor wR and 
 goodness of fit S are based on F^2^, conventional R-factors R are based 
 on F, with F set to zero for negative F^2^. The threshold expression of 
 F^2^ > 2sigma(F^2^) is used only for calculating R-factors(gt) etc. and is 
 not relevant to the choice of reflections for refinement.  R-factors based 
 on F^2^ are statistically about twice as large as those based on F, and R- 
 factors based on ALL data will be even larger.
 3 toluene molecules (0.5 per asymmetric unit).
 Merohedral twin (-1 0 0 0 -1 0 0 0 1), BASF = 0.0419(4)

; 
 
_refine_ls_structure_factor_coef  Fsqd  
_refine_ls_matrix_type            full 
_refine_ls_weighting_scheme       calc  
_refine_ls_weighting_details 
 'calc w=1/[\s^2^(Fo^2^)+(0.0692P)^2^+2.2561P] where P=(Fo^2^+2Fc^2^)/3' 
_atom_sites_solution_primary      direct 
_atom_sites_solution_secondary    difmap 
_atom_sites_solution_hydrogens    geom 
_refine_ls_hydrogen_treatment     constr 
_refine_ls_extinction_method      none 
_refine_ls_extinction_coef        ? 
_refine_ls_abs_structure_details 
 'Flack H D (1983), Acta Cryst. A39, 876-881' 
_refine_ls_abs_structure_Flack    0.030(11) 
_refine_ls_number_reflns          12234 
_refine_ls_number_parameters      599 
_refine_ls_number_restraints      84 
_refine_ls_R_factor_all           0.0534 
_refine_ls_R_factor_gt            0.0460 
_refine_ls_wR_factor_ref          0.1200 
_refine_ls_wR_factor_gt           0.1149 
_refine_ls_goodness_of_fit_ref    1.092 
_refine_ls_restrained_S_all       1.089 
_refine_ls_shift/su_max           0.001 
_refine_ls_shift/su_mean          0.000 
 
loop_ 
 _atom_site_label 
 _atom_site_type_symbol 
 _atom_site_fract_x 
 _atom_site_fract_y 
 _atom_site_fract_z 
 _atom_site_U_iso_or_equiv 
 _atom_site_adp_type 
 _atom_site_occupancy 
 _atom_site_symmetry_multiplicity 
 _atom_site_calc_flag 
 _atom_site_refinement_flags 
 _atom_site_disorder_assembly 
 _atom_site_disorder_group 
Zn1 Zn 0.55723(3) 0.38053(3) 0.097426(7) 0.03710(10) Uani 1 1 d . . . 
C1 C 0.8226(3) 0.5694(3) 0.18235(6) 0.0415(7) Uani 1 1 d . . . 
H1 H 0.8539 0.6090 0.1979 0.050 Uiso 1 1 calc R . . 
C2 C 0.8603(3) 0.4986(3) 0.17235(6) 0.0389(7) Uani 1 1 d . . . 
H2 H 0.9192 0.4918 0.1811 0.047 Uiso 1 1 calc R . . 
C3 C 0.8161(3) 0.4365(3) 0.14999(6) 0.0362(6) Uani 1 1 d . . . 
C4 C 0.7487(3) 0.4671(3) 0.13434(6) 0.0335(6) Uani 1 1 d . . . 
O4 O 0.7129(2) 0.4162(2) 0.11168(4) 0.0374(5) Uani 1 1 d . . . 
C5 C 0.7151(3) 0.5464(3) 0.14354(6) 0.0355(6) Uani 1 1 d . . . 
C6 C 0.7386(3) 0.5829(3) 0.16963(6) 0.0394(7) Uani 1 1 d . . . 
C7 C 0.6545(4) 0.6045(4) 0.18524(6) 0.0480(9) Uani 1 1 d . . . 
H7A H 0.5973 0.6078 0.1737 0.058 Uiso 1 1 calc R . . 
H7B H 0.6982 0.6806 0.1939 0.058 Uiso 1 1 calc R . . 
C8 C 0.5875(4) 0.5056(4) 0.20585(7) 0.0555(10) Uani 1 1 d . . . 
H8A H 0.6300 0.5303 0.2222 0.067 Uiso 1 1 calc R . . 
H8B H 0.5091 0.4954 0.2086 0.067 Uiso 1 1 calc R . . 
C9 C 0.5756(3) 0.3927(4) 0.19808(7) 0.0520(9) Uani 1 1 d . . . 
C10 C 0.5211(3) 0.3380(4) 0.17522(8) 0.0538(10) Uani 1 1 d . . . 
H10 H 0.4629 0.3516 0.1683 0.065 Uiso 1 1 calc R . . 
C11 C 0.5503(3) 0.2651(4) 0.16265(8) 0.0534(9) Uani 1 1 d . . . 
H11 H 0.5121 0.2295 0.1472 0.064 Uiso 1 1 calc R . . 
C12 C 0.6358(3) 0.2426(3) 0.17240(8) 0.0536(10) Uani 1 1 d . . . 
C13 C 0.6700(4) 0.2754(4) 0.19770(8) 0.0573(10) Uani 1 1 d . . . 
H13 H 0.7131 0.2467 0.2065 0.069 Uiso 1 1 calc R . . 
C14 C 0.6403(3) 0.3502(4) 0.20994(7) 0.0544(10) Uani 1 1 d . . . 
H14 H 0.6652 0.3728 0.2270 0.065 Uiso 1 1 calc R . . 
C15 C 0.7033(4) 0.2130(4) 0.15394(9) 0.0627(11) Uani 1 1 d . . . 
H15A H 0.6555 0.1764 0.1386 0.075 Uiso 1 1 calc R . . 
H15B H 0.7218 0.1565 0.1618 0.075 Uiso 1 1 calc R . . 
C16 C 0.8203(3) 0.3264(3) 0.14597(7) 0.0426(7) Uani 1 1 d . . . 
H16A H 0.8853 0.3306 0.1560 0.051 Uiso 1 1 calc R . . 
H16B H 0.8361 0.3204 0.1278 0.051 Uiso 1 1 calc R . . 
C17 C 0.6602(3) 0.5974(3) 0.12753(6) 0.0371(7) Uani 1 1 d . . . 
C18 C 0.6899(4) 0.7200(3) 0.13421(7) 0.0442(8) Uani 1 1 d . . . 
H18A H 0.7336 0.7724 0.1202 0.066 Uiso 1 1 calc R . . 
H18B H 0.7373 0.7448 0.1497 0.066 Uiso 1 1 calc R . . 
H18C H 0.6181 0.7221 0.1371 0.066 Uiso 1 1 calc R . . 
N18 N 0.5955(3) 0.5450(2) 0.10785(5) 0.0357(6) Uani 1 1 d . . . 
C19 C 0.5431(3) 0.6042(3) 0.09361(6) 0.0394(7) Uani 1 1 d . . . 
H19 H 0.5117 0.6374 0.1063 0.047 Uiso 1 1 calc R . . 
C20 C 0.4406(3) 0.5129(4) 0.07813(7) 0.0476(8) Uani 1 1 d . . . 
H20A H 0.3998 0.5489 0.0701 0.071 Uiso 1 1 calc R . . 
H20B H 0.3870 0.4501 0.0894 0.071 Uiso 1 1 calc R . . 
H20C H 0.4692 0.4811 0.0650 0.071 Uiso 1 1 calc R . . 
C21 C 0.6284(3) 0.7030(3) 0.07679(6) 0.0393(7) Uani 1 1 d . . . 
C22 C 0.6385(4) 0.8116(4) 0.07849(7) 0.0503(9) Uani 1 1 d . . . 
H22 H 0.5937 0.8250 0.0907 0.060 Uiso 1 1 calc R . . 
C23 C 0.7141(5) 0.9018(4) 0.06246(9) 0.0624(11) Uani 1 1 d . . . 
H23 H 0.7223 0.9767 0.0641 0.075 Uiso 1 1 calc R . . 
C24 C 0.7768(4) 0.8821(4) 0.04425(10) 0.0627(11) Uani 1 1 d . . . 
H24 H 0.8272 0.9429 0.0331 0.075 Uiso 1 1 calc R . . 
C25 C 0.7659(4) 0.7734(4) 0.04230(9) 0.0567(10) Uani 1 1 d . . . 
H25 H 0.8084 0.7594 0.0296 0.068 Uiso 1 1 calc R . . 
C26 C 0.6938(3) 0.6846(3) 0.05858(7) 0.0444(8) Uani 1 1 d . . . 
H26 H 0.6888 0.6109 0.0574 0.053 Uiso 1 1 calc R . . 
C27 C 0.4073(4) 0.2374(4) 0.10314(9) 0.0620(11) Uani 1 1 d . . . 
H27A H 0.4175 0.1697 0.1013 0.093 Uiso 1 1 calc R . . 
H27B H 0.3504 0.2328 0.0906 0.093 Uiso 1 1 calc R . . 
H27C H 0.3793 0.2387 0.1203 0.093 Uiso 1 1 calc R . . 
Zn1' Zn 0.77042(3) 0.36719(3) 0.079719(7) 0.03655(9) Uani 1 1 d . . . 
C1' C 0.6620(4) 0.4703(4) -0.01283(7) 0.0479(9) Uani 1 1 d . . . 
H1' H 0.6655 0.4963 -0.0298 0.058 Uiso 1 1 calc R . . 
C2' C 0.5548(4) 0.4098(4) -0.00020(7) 0.0490(9) Uani 1 1 d . . . 
H2' H 0.4861 0.3952 -0.0089 0.059 Uiso 1 1 calc R . . 
C3' C 0.5462(3) 0.3708(3) 0.02449(7) 0.0440(7) Uani 1 1 d . . . 
C4' C 0.6509(3) 0.4154(3) 0.03896(6) 0.0382(7) Uani 1 1 d . . . 
O4' O 0.6441(2) 0.3886(2) 0.06368(4) 0.0382(5) Uani 1 1 d . . . 
C5' C 0.7590(3) 0.4820(3) 0.02664(6) 0.0389(7) Uani 1 1 d . . . 
C6' C 0.7606(3) 0.4913(3) -0.00057(6) 0.0445(8) Uani 1 1 d . . . 
C7' C 0.8592(4) 0.4942(4) -0.01623(7) 0.0531(9) Uani 1 1 d . . . 
H7'1 H 0.9209 0.5013 -0.0045 0.064 Uiso 1 1 calc R . . 
H7'2 H 0.8932 0.5637 -0.0273 0.064 Uiso 1 1 calc R . . 
C8' C 0.8184(4) 0.3847(5) -0.03288(8) 0.0663(13) Uani 1 1 d . . . 
H8'1 H 0.7941 0.3980 -0.0498 0.080 Uiso 1 1 calc R . . 
H8'2 H 0.8839 0.3701 -0.0354 0.080 Uiso 1 1 calc R . . 
C9' C 0.7181(4) 0.2797(4) -0.02059(8) 0.0590(11) Uani 1 1 d . . . 
C10' C 0.7286(4) 0.2457(4) 0.00420(8) 0.0596(11) Uani 1 1 d . . . 
H10' H 0.8030 0.2636 0.0103 0.071 Uiso 1 1 calc R . . 
C11' C 0.6324(4) 0.1868(4) 0.01972(9) 0.0598(10) Uani 1 1 d . . . 
H11' H 0.6420 0.1653 0.0364 0.072 Uiso 1 1 calc R . . 
C12' C 0.5224(4) 0.1584(4) 0.01147(9) 0.0599(11) Uani 1 1 d . . . 
C13' C 0.5082(5) 0.1671(4) -0.01464(10) 0.0650(12) Uani 1 1 d . . . 
H13' H 0.4324 0.1312 -0.0218 0.078 Uiso 1 1 calc R . . 
C14' C 0.6052(5) 0.2284(4) -0.03023(8) 0.0636(12) Uani 1 1 d . . . 
H14' H 0.5941 0.2354 -0.0479 0.076 Uiso 1 1 calc R . . 
C15' C 0.4339(4) 0.1497(4) 0.03061(10) 0.0692(12) Uani 1 1 d . . . 
H15C H 0.4511 0.1275 0.0474 0.083 Uiso 1 1 calc R . . 
H15D H 0.3556 0.0880 0.0253 0.083 Uiso 1 1 calc R . . 
C16' C 0.4343(4) 0.2678(4) 0.03332(8) 0.0541(10) Uani 1 1 d . . . 
H16C H 0.3692 0.2634 0.0233 0.065 Uiso 1 1 calc R . . 
H16D H 0.4213 0.2792 0.0514 0.065 Uiso 1 1 calc R . . 
C17' C 0.8715(3) 0.5472(3) 0.03991(6) 0.0378(7) Uani 1 1 d . . . 
C18' C 0.9626(3) 0.6596(3) 0.02759(7) 0.0446(8) Uani 1 1 d . . . 
H18D H 0.9805 0.7251 0.0389 0.067 Uiso 1 1 calc R . . 
H18E H 0.9327 0.6705 0.0114 0.067 Uiso 1 1 calc R . . 
H18F H 1.0334 0.6558 0.0245 0.067 Uiso 1 1 calc R . . 
N18' N 0.8920(2) 0.5165(2) 0.06192(5) 0.0362(6) Uani 1 1 d . . . 
C19' C 1.0096(3) 0.5876(3) 0.07321(6) 0.0388(7) Uani 1 1 d . . . 
H19' H 1.0678 0.6002 0.0597 0.047 Uiso 1 1 calc R . . 
C20' C 1.0244(3) 0.5180(3) 0.09462(7) 0.0461(8) Uani 1 1 d . . . 
H20D H 1.1028 0.5628 0.1018 0.069 Uiso 1 1 calc R . . 
H20E H 1.0129 0.4442 0.0878 0.069 Uiso 1 1 calc R . . 
H20F H 0.9668 0.5023 0.1080 0.069 Uiso 1 1 calc R . . 
C21' C 1.0363(3) 0.7054(3) 0.08280(6) 0.0400(7) Uani 1 1 d . . . 
C22' C 1.1450(3) 0.8016(4) 0.07787(7) 0.0483(9) Uani 1 1 d . . . 
H22' H 1.2002 0.7915 0.0684 0.058 Uiso 1 1 calc R . . 
C23' C 1.1745(4) 0.9108(4) 0.08645(8) 0.0587(11) Uani 1 1 d . . . 
H23' H 1.2487 0.9754 0.0826 0.070 Uiso 1 1 calc R . . 
C24' C 1.0971(5) 0.9261(4) 0.10053(11) 0.0769(14) Uani 1 1 d . . . 
H24' H 1.1177 1.0009 0.1069 0.092 Uiso 1 1 calc R . . 
C25' C 0.9881(5) 0.8316(4) 0.10547(12) 0.0812(16) Uani 1 1 d . . . 
H25' H 0.9333 0.8425 0.1149 0.097 Uiso 1 1 calc R . . 
C26' C 0.9580(4) 0.7215(4) 0.09685(8) 0.0570(10) Uani 1 1 d . . . 
H26' H 0.8834 0.6573 0.1006 0.068 Uiso 1 1 calc R . . 
C27' C 0.7710(4) 0.2187(4) 0.08027(9) 0.0597(11) Uani 1 1 d . . . 
H27D H 0.6937 0.1556 0.0851 0.090 Uiso 1 1 calc R . . 
H27E H 0.8286 0.2238 0.0926 0.090 Uiso 1 1 calc R . . 
H27F H 0.7908 0.2031 0.0633 0.090 Uiso 1 1 calc R . . 
C1T C 0.0917(8) 0.0961(8) -0.02851(14) 0.046(3) Uiso 0.25 1 d PGDU A -1 
H1T H 0.0752 0.1452 -0.0387 0.055 Uiso 0.25 1 calc PR A -1 
C2T C 0.0459(7) 0.0662(8) -0.00410(14) 0.046(3) Uiso 0.25 1 d PGDU A -1 
H2T H -0.0018 0.0949 0.0024 0.055 Uiso 0.25 1 calc PR A -1 
C3T C 0.0699(8) -0.0056(8) 0.01084(12) 0.047(3) Uiso 0.25 1 d PGDU A -1 
H3T H 0.0387 -0.0260 0.0275 0.056 Uiso 0.25 1 calc PR A -1 
C4T C 0.1397(8) -0.0475(7) 0.00137(13) 0.037(2) Uiso 0.25 1 d PGDU A -1 
H4T H 0.1561 -0.0966 0.0116 0.044 Uiso 0.25 1 calc PR A -1 
C5T C 0.1855(7) -0.0176(7) -0.02304(14) 0.037(2) Uiso 0.25 1 d PGDU A -1 
H5T H 0.2331 -0.0463 -0.0295 0.044 Uiso 0.25 1 calc PR A -1 
C6T C 0.1614(8) 0.0542(8) -0.03798(12) 0.039(2) Uiso 0.25 1 d PGDU A -1 
C7T C 0.2103(15) 0.0876(15) -0.0642(3) 0.059(4) Uiso 0.25 1 d PDU A -1 
H7T1 H 0.2824 0.0845 -0.0653 0.089 Uiso 0.25 1 calc PR A -1 
H7T2 H 0.2268 0.1667 -0.0679 0.089 Uiso 0.25 1 calc PR A -1 
H7T3 H 0.1539 0.0335 -0.0765 0.089 Uiso 0.25 1 calc PR A -1 
C8T C 0.1315(15) 0.1428(12) -0.1483(4) 0.047(4) Uiso 0.125 1 d PGDU B -1 
H8T H 0.1271 0.2094 -0.1532 0.057 Uiso 0.125 1 calc PR B -1 
C9T C 0.2299(13) 0.1561(13) -0.1359(4) 0.050(4) Uiso 0.125 1 d PGDU B -1 
H9T H 0.2928 0.2317 -0.1323 0.060 Uiso 0.125 1 calc PR B -1 
C10T C 0.2363(14) 0.0587(16) -0.1287(4) 0.044(4) Uiso 0.125 1 d PGDU B -1 
H10T H 0.3035 0.0678 -0.1203 0.052 Uiso 0.125 1 calc PR B -1 
C11T C 0.1443(16) -0.0520(14) -0.1339(4) 0.054(4) Uiso 0.125 1 d PGDU B -1 
H11T H 0.1487 -0.1185 -0.1290 0.065 Uiso 0.125 1 calc PR B -1 
C12T C 0.0459(14) -0.0653(11) -0.1463(4) 0.050(4) Uiso 0.125 1 d PGDU B -1 
H12T H -0.0169 -0.1409 -0.1499 0.060 Uiso 0.125 1 calc PR B -1 
C13T C 0.0395(12) 0.0321(13) -0.1535(3) 0.049(4) Uiso 0.125 1 d PGDU B -1 
C14T C -0.067(2) 0.018(2) -0.1664(8) 0.059(6) Uiso 0.125 1 d PDU B -1 
H14A H -0.1287 -0.0638 -0.1653 0.089 Uiso 0.125 1 calc PR B -1 
H14B H -0.0492 0.0400 -0.1843 0.089 Uiso 0.125 1 calc PR B -1 
H14C H -0.0921 0.0673 -0.1581 0.089 Uiso 0.125 1 calc PR B -1 
C15T C 0.1053(9) -0.0141(11) -0.0863(2) 0.030(3) Uiso 0.125 1 d PGDU C -2 
H15T H 0.0460 -0.0414 -0.0737 0.036 Uiso 0.125 1 calc PR C -2 
C16T C 0.0839(11) -0.0708(11) -0.1096(3) 0.033(3) Uiso 0.125 1 d PGDU C -2 
H16T H 0.0100 -0.1369 -0.1129 0.040 Uiso 0.125 1 calc PR C -2 
C17T C 0.1707(13) -0.0309(13) -0.1280(2) 0.039(4) Uiso 0.125 1 d PGDU C -2 
H17T H 0.1560 -0.0697 -0.1439 0.047 Uiso 0.125 1 calc PR C -2 
C18T C 0.2788(12) 0.0658(14) -0.1231(2) 0.038(4) Uiso 0.125 1 d PGDU C -2 
H18T H 0.3380 0.0930 -0.1357 0.046 Uiso 0.125 1 calc PR C -2 
C19T C 0.3002(9) 0.1225(11) -0.0998(2) 0.031(3) Uiso 0.125 1 d PGDU C -2 
H19T H 0.3740 0.1885 -0.0965 0.037 Uiso 0.125 1 calc PR C -2 
C20T C 0.2134(10) 0.0825(11) -0.0814(2) 0.025(3) Uiso 0.125 1 d PGDU C -2 
C21T C 0.2366(17) 0.1419(19) -0.0568(3) 0.032(4) Uiso 0.125 1 d PDU C -2 
H21A H 0.3188 0.1742 -0.0524 0.048 Uiso 0.125 1 calc PR C -2 
H21B H 0.1881 0.0862 -0.0437 0.048 Uiso 0.125 1 calc PR C -2 
H21C H 0.2185 0.2048 -0.0579 0.048 Uiso 0.125 1 calc PR C -2 
 
loop_ 
 _atom_site_aniso_label 
 _atom_site_aniso_U_11 
 _atom_site_aniso_U_22 
 _atom_site_aniso_U_33 
 _atom_site_aniso_U_23 
 _atom_site_aniso_U_13 
 _atom_site_aniso_U_12 
Zn1 0.03234(18) 0.03389(19) 0.04252(19) 0.00266(16) 0.00014(15) 0.01464(16) 
C1 0.0366(17) 0.0465(19) 0.0336(16) 0.0015(14) 0.0049(13) 0.0149(15) 
C2 0.0301(15) 0.0476(18) 0.0356(15) 0.0070(13) 0.0030(12) 0.0167(14) 
C3 0.0299(15) 0.0404(16) 0.0353(14) 0.0060(12) 0.0037(12) 0.0153(14) 
C4 0.0305(14) 0.0318(15) 0.0346(14) 0.0055(12) 0.0041(11) 0.0128(13) 
O4 0.0395(12) 0.0397(12) 0.0348(11) -0.0009(9) -0.0012(9) 0.0213(10) 
C5 0.0344(16) 0.0357(16) 0.0330(14) 0.0039(12) 0.0061(12) 0.0149(13) 
C6 0.0441(18) 0.0427(18) 0.0334(15) 0.0034(13) 0.0066(13) 0.0232(16) 
C7 0.052(2) 0.071(3) 0.0311(15) -0.0010(16) 0.0036(15) 0.039(2) 
C8 0.048(2) 0.088(3) 0.0377(18) 0.0082(19) 0.0091(16) 0.040(2) 
C9 0.0335(17) 0.070(3) 0.0446(18) 0.0179(18) 0.0124(14) 0.0200(18) 
C10 0.0374(18) 0.062(2) 0.053(2) 0.0205(18) 0.0090(15) 0.0176(18) 
C11 0.041(2) 0.045(2) 0.057(2) 0.0131(17) 0.0024(17) 0.0088(17) 
C12 0.0424(19) 0.0400(19) 0.065(2) 0.0171(17) 0.0052(16) 0.0106(16) 
C13 0.040(2) 0.060(2) 0.061(2) 0.026(2) 0.0072(17) 0.0174(18) 
C14 0.0380(18) 0.070(3) 0.0445(18) 0.0190(18) 0.0100(15) 0.0194(19) 
C15 0.061(3) 0.042(2) 0.079(3) 0.0098(19) 0.003(2) 0.022(2) 
C16 0.0411(18) 0.044(2) 0.0456(18) 0.0051(15) -0.0009(14) 0.0239(16) 
C17 0.0379(17) 0.0400(17) 0.0350(15) 0.0059(13) 0.0116(13) 0.0208(14) 
C18 0.060(2) 0.0429(19) 0.0367(16) -0.0007(14) 0.0050(15) 0.0307(18) 
N18 0.0379(14) 0.0395(15) 0.0332(13) 0.0046(11) 0.0054(11) 0.0220(12) 
C19 0.0426(18) 0.0461(19) 0.0378(16) 0.0051(14) 0.0071(14) 0.0284(16) 
C20 0.046(2) 0.048(2) 0.048(2) 0.0131(16) 0.0018(16) 0.0228(17) 
C21 0.0471(19) 0.0429(18) 0.0355(16) 0.0017(13) 0.0029(14) 0.0282(16) 
C22 0.070(3) 0.047(2) 0.0448(19) 0.0022(16) 0.0053(18) 0.037(2) 
C23 0.081(3) 0.038(2) 0.067(3) 0.0042(19) 0.000(2) 0.029(2) 
C24 0.061(3) 0.048(2) 0.072(3) 0.021(2) 0.009(2) 0.022(2) 
C25 0.059(2) 0.054(2) 0.062(2) 0.0163(18) 0.020(2) 0.032(2) 
C26 0.050(2) 0.0406(18) 0.0458(18) 0.0042(14) 0.0127(16) 0.0248(16) 
C27 0.042(2) 0.053(2) 0.069(3) 0.015(2) -0.0098(19) 0.0071(19) 
Zn1' 0.0388(2) 0.03225(18) 0.04126(18) -0.00552(15) -0.00426(16) 0.01979(16) 
C1' 0.067(3) 0.060(2) 0.0358(16) -0.0118(15) -0.0112(17) 0.045(2) 
C2' 0.063(2) 0.058(2) 0.0489(19) -0.0216(17) -0.0213(17) 0.047(2) 
C3' 0.0481(19) 0.0469(19) 0.0471(17) -0.0151(15) -0.0108(15) 0.0314(17) 
C4' 0.0461(18) 0.0384(17) 0.0373(15) -0.0092(13) -0.0074(13) 0.0264(15) 
O4' 0.0401(12) 0.0386(12) 0.0375(11) -0.0049(9) -0.0034(9) 0.0209(10) 
C5' 0.0482(18) 0.0437(18) 0.0343(15) -0.0079(13) -0.0054(13) 0.0303(16) 
C6' 0.057(2) 0.052(2) 0.0357(16) -0.0094(15) -0.0038(15) 0.0358(18) 
C7' 0.059(2) 0.074(3) 0.0363(17) -0.0069(17) 0.0008(16) 0.041(2) 
C8' 0.077(3) 0.099(4) 0.049(2) -0.023(2) -0.009(2) 0.063(3) 
C9' 0.074(3) 0.074(3) 0.055(2) -0.029(2) -0.017(2) 0.056(3) 
C10' 0.071(3) 0.061(3) 0.067(2) -0.029(2) -0.023(2) 0.048(2) 
C11' 0.075(3) 0.045(2) 0.068(2) -0.022(2) -0.022(2) 0.037(2) 
C12' 0.067(3) 0.042(2) 0.077(3) -0.0255(19) -0.020(2) 0.031(2) 
C13' 0.070(3) 0.057(2) 0.080(3) -0.033(2) -0.031(2) 0.041(2) 
C14' 0.083(3) 0.072(3) 0.062(2) -0.031(2) -0.023(2) 0.059(3) 
C15' 0.061(3) 0.046(2) 0.088(3) -0.018(2) -0.015(2) 0.017(2) 
C16' 0.045(2) 0.062(2) 0.058(2) -0.0150(19) -0.0133(17) 0.0286(19) 
C17' 0.0445(18) 0.0445(17) 0.0303(14) -0.0058(12) 0.0006(13) 0.0268(16) 
C18' 0.047(2) 0.050(2) 0.0354(17) 0.0012(15) 0.0030(14) 0.0234(17) 
N18' 0.0363(14) 0.0397(15) 0.0362(13) -0.0082(11) -0.0029(11) 0.0216(12) 
C19' 0.0340(15) 0.0451(18) 0.0335(15) -0.0054(14) 0.0023(12) 0.0169(14) 
C20' 0.0395(18) 0.053(2) 0.0431(19) -0.0068(15) -0.0068(14) 0.0213(16) 
C21' 0.0387(17) 0.0449(19) 0.0317(16) -0.0041(13) 0.0016(13) 0.0173(15) 
C22' 0.044(2) 0.051(2) 0.0382(18) -0.0020(16) 0.0042(15) 0.0155(17) 
C23' 0.055(2) 0.047(2) 0.050(2) 0.0016(17) 0.0018(18) 0.008(2) 
C24' 0.073(3) 0.046(2) 0.099(4) -0.018(3) 0.002(3) 0.020(2) 
C25' 0.063(3) 0.054(3) 0.116(4) -0.026(3) 0.023(3) 0.022(2) 
C26' 0.049(2) 0.045(2) 0.068(2) -0.0098(18) 0.017(2) 0.0158(18) 
C27' 0.076(3) 0.050(2) 0.064(2) -0.0131(19) -0.016(2) 0.040(2) 
 
_geom_special_details 
; 
 All esds (except the esd in the dihedral angle between two l.s. planes) 
 are estimated using the full covariance matrix.  The cell esds are taken 
 into account individually in the estimation of esds in distances, angles 
 and torsion angles; correlations between esds in cell parameters are only 
 used when they are defined by crystal symmetry.  An approximate (isotropic) 
 treatment of cell esds is used for estimating esds involving l.s. planes. 
; 
 
loop_ 
 _geom_bond_atom_site_label_1 
 _geom_bond_atom_site_label_2 
 _geom_bond_distance 
 _geom_bond_site_symmetry_2 
 _geom_bond_publ_flag 
Zn1 C27 1.971(4) . ? 
Zn1 O4 2.020(2) . ? 
Zn1 N18 2.055(3) . ? 
Zn1 O4' 2.090(2) . ? 
Zn1 Zn1' 3.0685(5) . ? 
C1 C2 1.372(5) . ? 
C1 C6 1.387(5) . ? 
C1 H1 0.9500 . ? 
C2 C3 1.386(5) . ? 
C2 H2 0.9500 . ? 
C3 C4 1.416(4) . ? 
C3 C16 1.506(5) . ? 
C4 O4 1.334(4) . ? 
C4 C5 1.419(5) . ? 
O4 Zn1' 2.080(2) . ? 
C5 C6 1.436(4) . ? 
C5 C17 1.480(5) . ? 
C6 C7 1.524(5) . ? 
C7 C8 1.588(6) . ? 
C7 H7A 0.9900 . ? 
C7 H7B 0.9900 . ? 
C8 C9 1.484(7) . ? 
C8 H8A 0.9900 . ? 
C8 H8B 0.9900 . ? 
C9 C14 1.390(6) . ? 
C9 C10 1.404(6) . ? 
C10 C11 1.379(6) . ? 
C10 H10 0.9500 . ? 
C11 C12 1.408(6) . ? 
C11 H11 0.9500 . ? 
C12 C13 1.402(6) . ? 
C12 C15 1.501(7) . ? 
C13 C14 1.396(7) . ? 
C13 H13 0.9500 . ? 
C14 H14 0.9500 . ? 
C15 C16 1.586(6) . ? 
C15 H15A 0.9900 . ? 
C15 H15B 0.9900 . ? 
C16 H16A 0.9900 . ? 
C16 H16B 0.9900 . ? 
C17 N18 1.302(4) . ? 
C17 C18 1.512(5) . ? 
C18 H18A 0.9800 . ? 
C18 H18B 0.9800 . ? 
C18 H18C 0.9800 . ? 
N18 C19 1.486(4) . ? 
C19 C21 1.516(5) . ? 
C19 C20 1.528(5) . ? 
C19 H19 1.0000 . ? 
C20 H20A 0.9800 . ? 
C20 H20B 0.9800 . ? 
C20 H20C 0.9800 . ? 
C21 C22 1.384(5) . ? 
C21 C26 1.393(5) . ? 
C22 C23 1.396(6) . ? 
C22 H22 0.9500 . ? 
C23 C24 1.377(7) . ? 
C23 H23 0.9500 . ? 
C24 C25 1.381(6) . ? 
C24 H24 0.9500 . ? 
C25 C26 1.382(5) . ? 
C25 H25 0.9500 . ? 
C26 H26 0.9500 . ? 
C27 H27A 0.9800 . ? 
C27 H27B 0.9800 . ? 
C27 H27C 0.9800 . ? 
Zn1' C27' 1.976(4) . ? 
Zn1' O4' 2.021(2) . ? 
Zn1' N18' 2.053(3) . ? 
C1' C6' 1.357(5) . ? 
C1' C2' 1.403(6) . ? 
C1' H1' 0.9500 . ? 
C2' C3' 1.381(5) . ? 
C2' H2' 0.9500 . ? 
C3' C4' 1.428(5) . ? 
C3' C16' 1.503(6) . ? 
C4' O4' 1.338(4) . ? 
C4' C5' 1.412(5) . ? 
C5' C6' 1.435(5) . ? 
C5' C17' 1.475(5) . ? 
C6' C7' 1.531(5) . ? 
C7' C8' 1.544(6) . ? 
C7' H7'1 0.9900 . ? 
C7' H7'2 0.9900 . ? 
C8' C9' 1.510(7) . ? 
C8' H8'1 0.9900 . ? 
C8' H8'2 0.9900 . ? 
C9' C14' 1.395(6) . ? 
C9' C10' 1.409(6) . ? 
C10' C11' 1.382(7) . ? 
C10' H10' 0.9500 . ? 
C11' C12' 1.384(7) . ? 
C11' H11' 0.9500 . ? 
C12' C13' 1.398(7) . ? 
C12' C15' 1.507(7) . ? 
C13' C14' 1.395(8) . ? 
C13' H13' 0.9500 . ? 
C14' H14' 0.9500 . ? 
C15' C16' 1.572(7) . ? 
C15' H15C 0.9900 . ? 
C15' H15D 0.9900 . ? 
C16' H16C 0.9900 . ? 
C16' H16D 0.9900 . ? 
C17' N18' 1.300(4) . ? 
C17' C18' 1.519(5) . ? 
C18' H18D 0.9800 . ? 
C18' H18E 0.9800 . ? 
C18' H18F 0.9800 . ? 
N18' C19' 1.486(4) . ? 
C19' C21' 1.507(5) . ? 
C19' C20' 1.530(5) . ? 
C19' H19' 1.0000 . ? 
C20' H20D 0.9800 . ? 
C20' H20E 0.9800 . ? 
C20' H20F 0.9800 . ? 
C21' C26' 1.377(5) . ? 
C21' C22' 1.393(5) . ? 
C22' C23' 1.376(6) . ? 
C22' H22' 0.9500 . ? 
C23' C24' 1.362(7) . ? 
C23' H23' 0.9500 . ? 
C24' C25' 1.387(7) . ? 
C24' H24' 0.9500 . ? 
C25' C26' 1.385(6) . ? 
C25' H25' 0.9500 . ? 
C26' H26' 0.9500 . ? 
C27' H27D 0.9800 . ? 
C27' H27E 0.9800 . ? 
C27' H27F 0.9800 . ? 
C1T C2T 1.3900 . ? 
C1T C6T 1.3900 . ? 
C1T H1T 0.9500 . ? 
C2T C3T 1.3900 . ? 
C2T H2T 0.9500 . ? 
C3T C4T 1.3900 . ? 
C3T H3T 0.9500 . ? 
C4T C5T 1.3900 . ? 
C4T H4T 0.9500 . ? 
C5T C6T 1.3900 . ? 
C5T H5T 0.9500 . ? 
C6T C7T 1.491(14) . ? 
C7T H7T1 0.9800 . ? 
C7T H7T2 0.9800 . ? 
C7T H7T3 0.9800 . ? 
C8T C9T 1.3900 . ? 
C8T C13T 1.3900 . ? 
C8T H8T 0.9500 . ? 
C9T C10T 1.3900 . ? 
C9T H9T 0.9500 . ? 
C10T C11T 1.3900 . ? 
C10T H10T 0.9500 . ? 
C11T C12T 1.3900 . ? 
C11T H11T 0.9500 . ? 
C12T C13T 1.3900 . ? 
C12T H12T 0.9500 . ? 
C13T C14T 1.489(18) . ? 
C14T H14A 0.9800 . ? 
C14T H14B 0.9800 . ? 
C14T H14C 0.9800 . ? 
C15T C16T 1.3900 . ? 
C15T C20T 1.3900 . ? 
C15T H15T 0.9500 . ? 
C16T C17T 1.3900 . ? 
C16T H16T 0.9500 . ? 
C17T C18T 1.3900 . ? 
C17T H17T 0.9500 . ? 
C18T C19T 1.3900 . ? 
C18T H18T 0.9500 . ? 
C19T C20T 1.3900 . ? 
C19T H19T 0.9500 . ? 
C20T C21T 1.466(16) . ? 
C21T H21A 0.9800 . ? 
C21T H21B 0.9800 . ? 
C21T H21C 0.9800 . ? 
 
loop_ 
 _geom_angle_atom_site_label_1 
 _geom_angle_atom_site_label_2 
 _geom_angle_atom_site_label_3 
 _geom_angle 
 _geom_angle_site_symmetry_1 
 _geom_angle_site_symmetry_3 
 _geom_angle_publ_flag 
C27 Zn1 O4 126.30(15) . . ? 
C27 Zn1 N18 125.32(19) . . ? 
O4 Zn1 N18 88.37(10) . . ? 
C27 Zn1 O4' 116.39(18) . . ? 
O4 Zn1 O4' 80.14(9) . . ? 
N18 Zn1 O4' 109.60(10) . . ? 
C27 Zn1 Zn1' 120.49(17) . . ? 
O4 Zn1 Zn1' 42.30(6) . . ? 
N18 Zn1 Zn1' 113.42(8) . . ? 
O4' Zn1 Zn1' 40.86(6) . . ? 
C2 C1 C6 119.8(3) . . ? 
C2 C1 H1 120.1 . . ? 
C6 C1 H1 120.1 . . ? 
C1 C2 C3 122.7(3) . . ? 
C1 C2 H2 118.6 . . ? 
C3 C2 H2 118.6 . . ? 
C2 C3 C4 117.6(3) . . ? 
C2 C3 C16 119.1(3) . . ? 
C4 C3 C16 122.2(3) . . ? 
O4 C4 C3 119.3(3) . . ? 
O4 C4 C5 121.0(3) . . ? 
C3 C4 C5 119.6(3) . . ? 
C4 O4 Zn1 120.91(19) . . ? 
C4 O4 Zn1' 141.8(2) . . ? 
Zn1 O4 Zn1' 96.88(9) . . ? 
C4 C5 C6 118.7(3) . . ? 
C4 C5 C17 123.7(3) . . ? 
C6 C5 C17 117.6(3) . . ? 
C1 C6 C5 118.0(3) . . ? 
C1 C6 C7 118.5(3) . . ? 
C5 C6 C7 121.4(3) . . ? 
C6 C7 C8 111.9(3) . . ? 
C6 C7 H7A 109.2 . . ? 
C8 C7 H7A 109.2 . . ? 
C6 C7 H7B 109.2 . . ? 
C8 C7 H7B 109.2 . . ? 
H7A C7 H7B 107.9 . . ? 
C9 C8 C7 112.3(3) . . ? 
C9 C8 H8A 109.1 . . ? 
C7 C8 H8A 109.1 . . ? 
C9 C8 H8B 109.1 . . ? 
C7 C8 H8B 109.1 . . ? 
H8A C8 H8B 107.9 . . ? 
C14 C9 C10 115.9(4) . . ? 
C14 C9 C8 120.8(4) . . ? 
C10 C9 C8 121.7(4) . . ? 
C11 C10 C9 121.4(4) . . ? 
C11 C10 H10 119.3 . . ? 
C9 C10 H10 119.3 . . ? 
C10 C11 C12 121.0(4) . . ? 
C10 C11 H11 119.5 . . ? 
C12 C11 H11 119.5 . . ? 
C13 C12 C11 116.7(4) . . ? 
C13 C12 C15 123.5(4) . . ? 
C11 C12 C15 118.1(4) . . ? 
C14 C13 C12 119.7(4) . . ? 
C14 C13 H13 120.2 . . ? 
C12 C13 H13 120.2 . . ? 
C9 C14 C13 122.3(4) . . ? 
C9 C14 H14 118.8 . . ? 
C13 C14 H14 118.8 . . ? 
C12 C15 C16 110.6(3) . . ? 
C12 C15 H15A 109.5 . . ? 
C16 C15 H15A 109.5 . . ? 
C12 C15 H15B 109.5 . . ? 
C16 C15 H15B 109.5 . . ? 
H15A C15 H15B 108.1 . . ? 
C3 C16 C15 113.0(3) . . ? 
C3 C16 H16A 109.0 . . ? 
C15 C16 H16A 109.0 . . ? 
C3 C16 H16B 109.0 . . ? 
C15 C16 H16B 109.0 . . ? 
H16A C16 H16B 107.8 . . ? 
N18 C17 C5 123.5(3) . . ? 
N18 C17 C18 120.4(3) . . ? 
C5 C17 C18 115.9(3) . . ? 
C17 C18 H18A 109.5 . . ? 
C17 C18 H18B 109.5 . . ? 
H18A C18 H18B 109.5 . . ? 
C17 C18 H18C 109.5 . . ? 
H18A C18 H18C 109.5 . . ? 
H18B C18 H18C 109.5 . . ? 
C17 N18 C19 118.5(3) . . ? 
C17 N18 Zn1 121.7(2) . . ? 
C19 N18 Zn1 119.7(2) . . ? 
N18 C19 C21 114.0(3) . . ? 
N18 C19 C20 108.4(3) . . ? 
C21 C19 C20 111.1(3) . . ? 
N18 C19 H19 107.7 . . ? 
C21 C19 H19 107.7 . . ? 
C20 C19 H19 107.7 . . ? 
C19 C20 H20A 109.5 . . ? 
C19 C20 H20B 109.5 . . ? 
H20A C20 H20B 109.5 . . ? 
C19 C20 H20C 109.5 . . ? 
H20A C20 H20C 109.5 . . ? 
H20B C20 H20C 109.5 . . ? 
C22 C21 C26 118.9(3) . . ? 
C22 C21 C19 120.4(3) . . ? 
C26 C21 C19 120.7(3) . . ? 
C21 C22 C23 120.6(4) . . ? 
C21 C22 H22 119.7 . . ? 
C23 C22 H22 119.7 . . ? 
C24 C23 C22 120.1(4) . . ? 
C24 C23 H23 120.0 . . ? 
C22 C23 H23 120.0 . . ? 
C23 C24 C25 119.5(4) . . ? 
C23 C24 H24 120.2 . . ? 
C25 C24 H24 120.2 . . ? 
C24 C25 C26 120.8(4) . . ? 
C24 C25 H25 119.6 . . ? 
C26 C25 H25 119.6 . . ? 
C25 C26 C21 120.2(3) . . ? 
C25 C26 H26 119.9 . . ? 
C21 C26 H26 119.9 . . ? 
Zn1 C27 H27A 109.5 . . ? 
Zn1 C27 H27B 109.5 . . ? 
H27A C27 H27B 109.5 . . ? 
Zn1 C27 H27C 109.5 . . ? 
H27A C27 H27C 109.5 . . ? 
H27B C27 H27C 109.5 . . ? 
C27' Zn1' O4' 124.33(15) . . ? 
C27' Zn1' N18' 125.25(17) . . ? 
O4' Zn1' N18' 88.95(10) . . ? 
C27' Zn1' O4 119.05(16) . . ? 
O4' Zn1' O4 80.37(9) . . ? 
N18' Zn1' O4 107.48(10) . . ? 
C27' Zn1' Zn1 121.14(15) . . ? 
O4' Zn1' Zn1 42.58(6) . . ? 
N18' Zn1' Zn1 112.67(8) . . ? 
O4 Zn1' Zn1 40.82(6) . . ? 
C6' C1' C2' 119.4(3) . . ? 
C6' C1' H1' 120.3 . . ? 
C2' C1' H1' 120.3 . . ? 
C3' C2' C1' 122.0(3) . . ? 
C3' C2' H2' 119.0 . . ? 
C1' C2' H2' 119.0 . . ? 
C2' C3' C4' 117.7(4) . . ? 
C2' C3' C16' 119.4(3) . . ? 
C4' C3' C16' 121.8(3) . . ? 
O4' C4' C5' 121.6(3) . . ? 
O4' C4' C3' 119.0(3) . . ? 
C5' C4' C3' 119.3(3) . . ? 
C4' O4' Zn1' 119.5(2) . . ? 
C4' O4' Zn1 143.1(2) . . ? 
Zn1' O4' Zn1 96.57(9) . . ? 
C4' C5' C6' 118.6(3) . . ? 
C4' C5' C17' 124.4(3) . . ? 
C6' C5' C17' 117.0(3) . . ? 
C1' C6' C5' 119.0(3) . . ? 
C1' C6' C7' 118.4(3) . . ? 
C5' C6' C7' 120.9(3) . . ? 
C6' C7' C8' 112.9(4) . . ? 
C6' C7' H7'1 109.0 . . ? 
C8' C7' H7'1 109.0 . . ? 
C6' C7' H7'2 109.0 . . ? 
C8' C7' H7'2 109.0 . . ? 
H7'1 C7' H7'2 107.8 . . ? 
C9' C8' C7' 111.0(3) . . ? 
C9' C8' H8'1 109.4 . . ? 
C7' C8' H8'1 109.4 . . ? 
C9' C8' H8'2 109.4 . . ? 
C7' C8' H8'2 109.4 . . ? 
H8'1 C8' H8'2 108.0 . . ? 
C14' C9' C10' 115.7(5) . . ? 
C14' C9' C8' 122.2(4) . . ? 
C10' C9' C8' 120.6(4) . . ? 
C11' C10' C9' 121.1(4) . . ? 
C11' C10' H10' 119.5 . . ? 
C9' C10' H10' 119.5 . . ? 
C10' C11' C12' 121.4(4) . . ? 
C10' C11' H11' 119.3 . . ? 
C12' C11' H11' 119.3 . . ? 
C11' C12' C13' 116.9(5) . . ? 
C11' C12' C15' 119.2(4) . . ? 
C13' C12' C15' 122.0(4) . . ? 
C14' C13' C12' 120.1(4) . . ? 
C14' C13' H13' 119.9 . . ? 
C12' C13' H13' 119.9 . . ? 
C13' C14' C9' 121.7(4) . . ? 
C13' C14' H14' 119.2 . . ? 
C9' C14' H14' 119.2 . . ? 
C12' C15' C16' 111.8(4) . . ? 
C12' C15' H15C 109.3 . . ? 
C16' C15' H15C 109.3 . . ? 
C12' C15' H15D 109.3 . . ? 
C16' C15' H15D 109.3 . . ? 
H15C C15' H15D 107.9 . . ? 
C3' C16' C15' 112.9(4) . . ? 
C3' C16' H16C 109.0 . . ? 
C15' C16' H16C 109.0 . . ? 
C3' C16' H16D 109.0 . . ? 
C15' C16' H16D 109.0 . . ? 
H16C C16' H16D 107.8 . . ? 
N18' C17' C5' 123.1(3) . . ? 
N18' C17' C18' 119.9(3) . . ? 
C5' C17' C18' 116.8(3) . . ? 
C17' C18' H18D 109.5 . . ? 
C17' C18' H18E 109.5 . . ? 
H18D C18' H18E 109.5 . . ? 
C17' C18' H18F 109.5 . . ? 
H18D C18' H18F 109.5 . . ? 
H18E C18' H18F 109.5 . . ? 
C17' N18' C19' 118.4(3) . . ? 
C17' N18' Zn1' 121.4(2) . . ? 
C19' N18' Zn1' 120.1(2) . . ? 
N18' C19' C21' 114.8(3) . . ? 
N18' C19' C20' 108.8(3) . . ? 
C21' C19' C20' 110.3(3) . . ? 
N18' C19' H19' 107.6 . . ? 
C21' C19' H19' 107.6 . . ? 
C20' C19' H19' 107.6 . . ? 
C19' C20' H20D 109.5 . . ? 
C19' C20' H20E 109.5 . . ? 
H20D C20' H20E 109.5 . . ? 
C19' C20' H20F 109.5 . . ? 
H20D C20' H20F 109.5 . . ? 
H20E C20' H20F 109.5 . . ? 
C26' C21' C22' 118.3(3) . . ? 
C26' C21' C19' 122.5(3) . . ? 
C22' C21' C19' 119.2(3) . . ? 
C23' C22' C21' 121.6(4) . . ? 
C23' C22' H22' 119.2 . . ? 
C21' C22' H22' 119.2 . . ? 
C24' C23' C22' 119.8(4) . . ? 
C24' C23' H23' 120.1 . . ? 
C22' C23' H23' 120.1 . . ? 
C23' C24' C25' 119.4(4) . . ? 
C23' C24' H24' 120.3 . . ? 
C25' C24' H24' 120.3 . . ? 
C26' C25' C24' 121.0(5) . . ? 
C26' C25' H25' 119.5 . . ? 
C24' C25' H25' 119.5 . . ? 
C21' C26' C25' 119.9(4) . . ? 
C21' C26' H26' 120.1 . . ? 
C25' C26' H26' 120.1 . . ? 
Zn1' C27' H27D 109.5 . . ? 
Zn1' C27' H27E 109.5 . . ? 
H27D C27' H27E 109.5 . . ? 
Zn1' C27' H27F 109.5 . . ? 
H27D C27' H27F 109.5 . . ? 
H27E C27' H27F 109.5 . . ? 
C2T C1T C6T 120.0 . . ? 
C2T C1T H1T 120.0 . . ? 
C6T C1T H1T 120.0 . . ? 
C3T C2T C1T 120.0 . . ? 
C3T C2T H2T 120.0 . . ? 
C1T C2T H2T 120.0 . . ? 
C4T C3T C2T 120.0 . . ? 
C4T C3T H3T 120.0 . . ? 
C2T C3T H3T 120.0 . . ? 
C3T C4T C5T 120.0 . . ? 
C3T C4T H4T 120.0 . . ? 
C5T C4T H4T 120.0 . . ? 
C6T C5T C4T 120.0 . . ? 
C6T C5T H5T 120.0 . . ? 
C4T C5T H5T 120.0 . . ? 
C5T C6T C1T 120.0 . . ? 
C5T C6T C7T 120.7(5) . . ? 
C1T C6T C7T 119.3(5) . . ? 
C9T C8T C13T 120.0 . . ? 
C9T C8T H8T 120.0 . . ? 
C13T C8T H8T 120.0 . . ? 
C10T C9T C8T 120.0 . . ? 
C10T C9T H9T 120.0 . . ? 
C8T C9T H9T 120.0 . . ? 
C9T C10T C11T 120.0 . . ? 
C9T C10T H10T 120.0 . . ? 
C11T C10T H10T 120.0 . . ? 
C10T C11T C12T 120.0 . . ? 
C10T C11T H11T 120.0 . . ? 
C12T C11T H11T 120.0 . . ? 
C13T C12T C11T 120.0 . . ? 
C13T C12T H12T 120.0 . . ? 
C11T C12T H12T 120.0 . . ? 
C12T C13T C8T 120.0 . . ? 
C12T C13T C14T 119.9(6) . . ? 
C8T C13T C14T 120.1(6) . . ? 
C16T C15T C20T 120.0 . . ? 
C16T C15T H15T 120.0 . . ? 
C20T C15T H15T 120.0 . . ? 
C17T C16T C15T 120.0 . . ? 
C17T C16T H16T 120.0 . . ? 
C15T C16T H16T 120.0 . . ? 
C16T C17T C18T 120.0 . . ? 
C16T C17T H17T 120.0 . . ? 
C18T C17T H17T 120.0 . . ? 
C19T C18T C17T 120.0 . . ? 
C19T C18T H18T 120.0 . . ? 
C17T C18T H18T 120.0 . . ? 
C18T C19T C20T 120.0 . . ? 
C18T C19T H19T 120.0 . . ? 
C20T C19T H19T 120.0 . . ? 
C19T C20T C15T 120.0 . . ? 
C19T C20T C21T 119.9(6) . . ? 
C15T C20T C21T 120.1(6) . . ? 
C20T C21T H21A 109.5 . . ? 
C20T C21T H21B 109.5 . . ? 
H21A C21T H21B 109.5 . . ? 
C20T C21T H21C 109.5 . . ? 
H21A C21T H21C 109.5 . . ? 
H21B C21T H21C 109.5 . . ? 
 
loop_ 
 _geom_torsion_atom_site_label_1 
 _geom_torsion_atom_site_label_2 
 _geom_torsion_atom_site_label_3 
 _geom_torsion_atom_site_label_4 
 _geom_torsion 
 _geom_torsion_site_symmetry_1 
 _geom_torsion_site_symmetry_2 
 _geom_torsion_site_symmetry_3 
 _geom_torsion_site_symmetry_4 
 _geom_torsion_publ_flag 
C6 C1 C2 C3 -1.4(5) . . . . ? 
C1 C2 C3 C4 13.9(5) . . . . ? 
C1 C2 C3 C16 -153.9(3) . . . . ? 
C2 C3 C4 O4 174.4(3) . . . . ? 
C16 C3 C4 O4 -18.2(4) . . . . ? 
C2 C3 C4 C5 -9.1(4) . . . . ? 
C16 C3 C4 C5 158.3(3) . . . . ? 
C3 C4 O4 Zn1 145.4(2) . . . . ? 
C5 C4 O4 Zn1 -31.1(4) . . . . ? 
C3 C4 O4 Zn1' -43.9(5) . . . . ? 
C5 C4 O4 Zn1' 139.6(3) . . . . ? 
C27 Zn1 O4 C4 -88.4(3) . . . . ? 
N18 Zn1 O4 C4 45.8(2) . . . . ? 
O4' Zn1 O4 C4 156.0(2) . . . . ? 
Zn1' Zn1 O4 C4 174.2(3) . . . . ? 
C27 Zn1 O4 Zn1' 97.4(2) . . . . ? 
N18 Zn1 O4 Zn1' -128.47(10) . . . . ? 
O4' Zn1 O4 Zn1' -18.25(9) . . . . ? 
O4 C4 C5 C6 169.2(3) . . . . ? 
C3 C4 C5 C6 -7.3(4) . . . . ? 
O4 C4 C5 C17 -13.0(5) . . . . ? 
C3 C4 C5 C17 170.6(3) . . . . ? 
C2 C1 C6 C5 -15.4(5) . . . . ? 
C2 C1 C6 C7 148.6(4) . . . . ? 
C4 C5 C6 C1 19.6(5) . . . . ? 
C17 C5 C6 C1 -158.4(3) . . . . ? 
C4 C5 C6 C7 -144.0(3) . . . . ? 
C17 C5 C6 C7 38.1(5) . . . . ? 
C1 C6 C7 C8 -55.8(5) . . . . ? 
C5 C6 C7 C8 107.7(4) . . . . ? 
C6 C7 C8 C9 -27.4(5) . . . . ? 
C7 C8 C9 C14 107.8(4) . . . . ? 
C7 C8 C9 C10 -57.3(5) . . . . ? 
C14 C9 C10 C11 -13.5(5) . . . . ? 
C8 C9 C10 C11 152.3(4) . . . . ? 
C9 C10 C11 C12 0.2(6) . . . . ? 
C10 C11 C12 C13 14.0(5) . . . . ? 
C10 C11 C12 C15 -151.7(4) . . . . ? 
C11 C12 C13 C14 -14.6(5) . . . . ? 
C15 C12 C13 C14 150.3(4) . . . . ? 
C10 C9 C14 C13 12.9(5) . . . . ? 
C8 C9 C14 C13 -153.0(4) . . . . ? 
C12 C13 C14 C9 1.2(6) . . . . ? 
C13 C12 C15 C16 -71.4(5) . . . . ? 
C11 C12 C15 C16 93.3(5) . . . . ? 
C2 C3 C16 C15 95.2(4) . . . . ? 
C4 C3 C16 C15 -72.0(4) . . . . ? 
C12 C15 C16 C3 -21.9(5) . . . . ? 
C4 C5 C17 N18 29.3(5) . . . . ? 
C6 C5 C17 N18 -152.9(3) . . . . ? 
C4 C5 C17 C18 -146.8(3) . . . . ? 
C6 C5 C17 C18 31.1(4) . . . . ? 
C5 C17 N18 C19 178.7(3) . . . . ? 
C18 C17 N18 C19 -5.4(4) . . . . ? 
C5 C17 N18 Zn1 2.1(4) . . . . ? 
C18 C17 N18 Zn1 178.1(2) . . . . ? 
C27 Zn1 N18 C17 104.1(3) . . . . ? 
O4 Zn1 N18 C17 -30.8(3) . . . . ? 
O4' Zn1 N18 C17 -109.7(2) . . . . ? 
Zn1' Zn1 N18 C17 -65.9(3) . . . . ? 
C27 Zn1 N18 C19 -72.4(3) . . . . ? 
O4 Zn1 N18 C19 152.7(2) . . . . ? 
O4' Zn1 N18 C19 73.8(2) . . . . ? 
Zn1' Zn1 N18 C19 117.7(2) . . . . ? 
C17 N18 C19 C21 75.5(4) . . . . ? 
Zn1 N18 C19 C21 -107.9(3) . . . . ? 
C17 N18 C19 C20 -160.2(3) . . . . ? 
Zn1 N18 C19 C20 16.4(3) . . . . ? 
N18 C19 C21 C22 -128.1(4) . . . . ? 
C20 C19 C21 C22 109.1(4) . . . . ? 
N18 C19 C21 C26 54.9(4) . . . . ? 
C20 C19 C21 C26 -67.9(4) . . . . ? 
C26 C21 C22 C23 -0.8(6) . . . . ? 
C19 C21 C22 C23 -177.9(4) . . . . ? 
C21 C22 C23 C24 2.0(7) . . . . ? 
C22 C23 C24 C25 -1.2(8) . . . . ? 
C23 C24 C25 C26 -0.7(8) . . . . ? 
C24 C25 C26 C21 1.8(7) . . . . ? 
C22 C21 C26 C25 -1.1(6) . . . . ? 
C19 C21 C26 C25 176.0(4) . . . . ? 
C4 O4 Zn1' C27' 82.8(4) . . . . ? 
Zn1 O4 Zn1' C27' -105.18(17) . . . . ? 
C4 O4 Zn1' O4' -153.1(3) . . . . ? 
Zn1 O4 Zn1' O4' 18.89(9) . . . . ? 
C4 O4 Zn1' N18' -67.3(3) . . . . ? 
Zn1 O4 Zn1' N18' 104.70(11) . . . . ? 
C4 O4 Zn1' Zn1 -172.0(4) . . . . ? 
C27 Zn1 Zn1' C27' -12.3(2) . . . . ? 
O4 Zn1 Zn1' C27' 99.70(18) . . . . ? 
N18 Zn1 Zn1' C27' 158.23(17) . . . . ? 
O4' Zn1 Zn1' C27' -108.45(18) . . . . ? 
C27 Zn1 Zn1' O4' 96.19(19) . . . . ? 
O4 Zn1 Zn1' O4' -151.86(14) . . . . ? 
N18 Zn1 Zn1' O4' -93.33(13) . . . . ? 
C27 Zn1 Zn1' N18' 157.23(17) . . . . ? 
O4 Zn1 Zn1' N18' -90.82(13) . . . . ? 
N18 Zn1 Zn1' N18' -32.29(11) . . . . ? 
O4' Zn1 Zn1' N18' 61.04(13) . . . . ? 
C27 Zn1 Zn1' O4 -111.95(19) . . . . ? 
N18 Zn1 Zn1' O4 58.53(12) . . . . ? 
O4' Zn1 Zn1' O4 151.86(14) . . . . ? 
C6' C1' C2' C3' 0.1(5) . . . . ? 
C1' C2' C3' C4' 13.7(5) . . . . ? 
C1' C2' C3' C16' -154.2(4) . . . . ? 
C2' C3' C4' O4' 173.2(3) . . . . ? 
C16' C3' C4' O4' -19.3(5) . . . . ? 
C2' C3' C4' C5' -9.6(5) . . . . ? 
C16' C3' C4' C5' 157.9(3) . . . . ? 
C5' C4' O4' Zn1' -31.2(4) . . . . ? 
C3' C4' O4' Zn1' 145.9(2) . . . . ? 
C5' C4' O4' Zn1 135.5(3) . . . . ? 
C3' C4' O4' Zn1 -47.5(5) . . . . ? 
C27' Zn1' O4' C4' -87.5(3) . . . . ? 
N18' Zn1' O4' C4' 45.8(2) . . . . ? 
O4 Zn1' O4' C4' 153.8(2) . . . . ? 
Zn1 Zn1' O4' C4' 172.0(3) . . . . ? 
C27' Zn1' O4' Zn1 100.5(2) . . . . ? 
N18' Zn1' O4' Zn1 -126.15(10) . . . . ? 
O4 Zn1' O4' Zn1 -18.22(9) . . . . ? 
C27 Zn1 O4' C4' 84.7(4) . . . . ? 
O4 Zn1 O4' C4' -149.6(4) . . . . ? 
N18 Zn1 O4' C4' -64.9(4) . . . . ? 
Zn1' Zn1 O4' C4' -168.3(4) . . . . ? 
C27 Zn1 O4' Zn1' -106.98(17) . . . . ? 
O4 Zn1 O4' Zn1' 18.80(9) . . . . ? 
N18 Zn1 O4' Zn1' 103.49(11) . . . . ? 
O4' C4' C5' C6' 169.8(3) . . . . ? 
C3' C4' C5' C6' -7.2(5) . . . . ? 
O4' C4' C5' C17' -12.5(5) . . . . ? 
C3' C4' C5' C17' 170.5(3) . . . . ? 
C2' C1' C6' C5' -17.7(5) . . . . ? 
C2' C1' C6' C7' 147.3(4) . . . . ? 
C4' C5' C6' C1' 21.2(5) . . . . ? 
C17' C5' C6' C1' -156.7(4) . . . . ? 
C4' C5' C6' C7' -143.4(4) . . . . ? 
C17' C5' C6' C7' 38.7(5) . . . . ? 
C1' C6' C7' C8' -52.3(5) . . . . ? 
C5' C6' C7' C8' 112.4(4) . . . . ? 
C6' C7' C8' C9' -30.5(5) . . . . ? 
C7' C8' C9' C14' 109.2(4) . . . . ? 
C7' C8' C9' C10' -56.0(5) . . . . ? 
C14' C9' C10' C11' -13.9(5) . . . . ? 
C8' C9' C10' C11' 152.2(4) . . . . ? 
C9' C10' C11' C12' 0.4(6) . . . . ? 
C10' C11' C12' C13' 14.4(6) . . . . ? 
C10' C11' C12' C15' -150.4(4) . . . . ? 
C11' C12' C13' C14' -15.4(6) . . . . ? 
C15' C12' C13' C14' 148.9(4) . . . . ? 
C12' C13' C14' C9' 1.7(6) . . . . ? 
C10' C9' C14' C13' 12.8(6) . . . . ? 
C8' C9' C14' C13' -153.0(4) . . . . ? 
C11' C12' C15' C16' 93.0(5) . . . . ? 
C13' C12' C15' C16' -71.0(5) . . . . ? 
C2' C3' C16' C15' 94.1(5) . . . . ? 
C4' C3' C16' C15' -73.2(5) . . . . ? 
C12' C15' C16' C3' -21.3(5) . . . . ? 
C4' C5' C17' N18' 28.4(5) . . . . ? 
C6' C5' C17' N18' -153.8(3) . . . . ? 
C4' C5' C17' C18' -147.1(3) . . . . ? 
C6' C5' C17' C18' 30.7(4) . . . . ? 
C5' C17' N18' C19' 178.8(3) . . . . ? 
C18' C17' N18' C19' -5.9(5) . . . . ? 
C5' C17' N18' Zn1' 3.3(4) . . . . ? 
C18' C17' N18' Zn1' 178.7(2) . . . . ? 
C27' Zn1' N18' C17' 100.8(3) . . . . ? 
O4' Zn1' N18' C17' -31.8(3) . . . . ? 
O4 Zn1' N18' C17' -111.4(3) . . . . ? 
Zn1 Zn1' N18' C17' -68.1(3) . . . . ? 
C27' Zn1' N18' C19' -74.6(3) . . . . ? 
O4' Zn1' N18' C19' 152.8(2) . . . . ? 
O4 Zn1' N18' C19' 73.2(2) . . . . ? 
Zn1 Zn1' N18' C19' 116.5(2) . . . . ? 
C17' N18' C19' C21' 71.8(4) . . . . ? 
Zn1' N18' C19' C21' -112.7(3) . . . . ? 
C17' N18' C19' C20' -164.2(3) . . . . ? 
Zn1' N18' C19' C20' 11.4(3) . . . . ? 
N18' C19' C21' C26' 44.3(5) . . . . ? 
C20' C19' C21' C26' -78.9(4) . . . . ? 
N18' C19' C21' C22' -137.3(3) . . . . ? 
C20' C19' C21' C22' 99.5(4) . . . . ? 
C26' C21' C22' C23' -0.7(6) . . . . ? 
C19' C21' C22' C23' -179.2(4) . . . . ? 
C21' C22' C23' C24' 1.3(7) . . . . ? 
C22' C23' C24' C25' -1.7(8) . . . . ? 
C23' C24' C25' C26' 1.7(10) . . . . ? 
C22' C21' C26' C25' 0.6(7) . . . . ? 
C19' C21' C26' C25' 179.0(5) . . . . ? 
C24' C25' C26' C21' -1.1(9) . . . . ? 
C6T C1T C2T C3T 0.0 . . . . ? 
C1T C2T C3T C4T 0.0 . . . . ? 
C2T C3T C4T C5T 0.0 . . . . ? 
C3T C4T C5T C6T 0.0 . . . . ? 
C4T C5T C6T C1T 0.0 . . . . ? 
C4T C5T C6T C7T 179.7(11) . . . . ? 
C2T C1T C6T C5T 0.0 . . . . ? 
C2T C1T C6T C7T -179.7(11) . . . . ? 
C13T C8T C9T C10T 0.0 . . . . ? 
C8T C9T C10T C11T 0.0 . . . . ? 
C9T C10T C11T C12T 0.0 . . . . ? 
C10T C11T C12T C13T 0.0 . . . . ? 
C11T C12T C13T C8T 0.0 . . . . ? 
C11T C12T C13T C14T -179(2) . . . . ? 
C9T C8T C13T C12T 0.0 . . . . ? 
C9T C8T C13T C14T 179(2) . . . . ? 
C20T C15T C16T C17T 0.0 . . . . ? 
C15T C16T C17T C18T 0.0 . . . . ? 
C16T C17T C18T C19T 0.0 . . . . ? 
C17T C18T C19T C20T 0.0 . . . . ? 
C18T C19T C20T C15T 0.0 . . . . ? 
C18T C19T C20T C21T 179.4(15) . . . . ? 
C16T C15T C20T C19T 0.0 . . . . ? 
C16T C15T C20T C21T -179.4(15) . . . . ? 
 
_diffrn_measured_fraction_theta_max    0.995 
_diffrn_reflns_theta_full              25.00 
_diffrn_measured_fraction_theta_full   0.993 
_refine_diff_density_max    0.509 
_refine_diff_density_min   -0.390 
_refine_diff_density_rms    0.067 

#==============================================================================
#_eof # End of Crystallographic Information File
